# Supplementary material for: Endometriosis - on the intersection of modern environmental pollutants and ancient genetic regulatory variants
Source: Eur J Hum Genet. 2025 Nov 20;34(2):243–51. doi: 10.1038/s41431-025-01977-9 (PMC12858970; doi:10.1038/s41431-025-01977-9)
Supplement: Supplementary file 2 — Supplementary data (LD) [file 41431_2025_1977_MOESM2_ESM.xlsx]

## Sheet: Sheet1
Population	Abbrev	N	rs76129761 Allele Freq	rs806372 Allele Freq	R2	D'	Chisq	P
All Populations	ALL	2504	CCT: 97.36%, C: 2.64%	G: 76.97%, C: 23.03%	0.0012	0.1141	5.9033	0.0151
African	AFR	661	CCT: 98.41%, C: 1.59%	G: 92.35%, C: 7.65%	0.0001	0.0203	0.1059	0.7449
Yoruba in Ibadan, Nigeria	YRI	108	CCT: 99.07%, C: 0.93%	G: 92.06%, C: 7.94%	0.0008	1	0.1742	0.6764
Luhya in Webuye, Kenya	LWK	99	CCT: 97.47%, C: 2.53%	G: 93.43%, C: 6.57%	0.0076	0.1438	1.5091	0.2193
Gambian in Western Divisions in the Gambia	GWD	113	CCT: 98.67%, C: 1.33%	G: 93.81%, C: 6.19%	0.0009	1	0.2008	0.6541
Mende in Sierra Leone	MSL	85	CCT: 99.41%, C: 0.59%	G: 94.71%, C: 5.29%	0.0003	1	0.0562	0.8126
Esan in Nigeria	ESN	99	CCT: 97.98%, C: 2.02%	G: 89.9%, C: 10.1%	0.0023	1	0.4587	0.4982
Americans of African Ancestry in SW USA	ASW	61	CCT: 97.54%, C: 2.46%	G: 92.62%, C: 7.38%	0.0249	0.2802	3.0326	0.0816
African Caribbeans in Barbados	ACB	96	CCT: 98.44%, C: 1.56%	G: 90.1%, C: 9.9%	0.0017	1	0.3347	0.5629
Ad Mixed American	AMR	347	CCT: 97.69%, C: 2.31%	G: 71.47%, C: 28.53%	0.0089	0.3879	6.1716	0.013
Mexican Ancestry from Los Angeles USA	MXL	64	CCT: 96.88%, C: 3.12%	G: 71.09%, C: 28.91%	0.0334	0.6484	4.2688	0.0388
Puerto Ricans from Puerto Rico	PUR	104	CCT: 97.12%, C: 2.88%	G: 82.69%, C: 17.31%	0.0506	0.5969	10.517	0.0012
Colombians from Medellin, Colombia	CLM	94	CCT: 97.34%, C: 2.66%	G: 70.74%, C: 29.26%	0.0011	0.3164	0.2126	0.6447
Peruvians from Lima, Peru	PEL	85	CCT: 99.41%, C: 0.59%	G: 58.82%, C: 41.18%	0.0085	1	1.437	0.2306
East Asian	EAS	504	CCT: 99.01%, C: 0.99%	G: 49.9%, C: 50.1%	0.0064	0.8004	6.4963	0.0108
Han Chinese in Beijing, China	CHB	103	CCT: 98.54%, C: 1.46%	G: 47.09%, C: 52.91%	0.0166	1	3.421	0.0644
Japanese in Tokyo, Japan	JPT	104	CCT: 98.56%, C: 1.44%	G: 50.0%, C: 50.0%	0.0016	0.3333	0.3382	0.5609
Southern Han Chinese	CHS	105	CCT: 98.57%, C: 1.43%	G: 52.86%, C: 47.14%	0.0129	1	2.7145	0.0994
Chinese Dai in Xishuangbanna, China	CDX	93	CCT: 100.0%, C: 0.0%	G: 50.54%, C: 49.46%	NA	NA	NA	NA
Kinh in Ho Chi Minh City, Vietnam	KHV	99	CCT: 99.49%, C: 0.51%	G: 48.99%, C: 51.01%	0.0053	1	1.0465	0.3063
European	EUR	503	CCT: 96.02%, C: 3.98%	G: 88.07%, C: 11.93%	0.0649	0.4607	65.2688	0
Utah Residents (CEPH) with Northern and Western European Ancestry	CEU	99	CCT: 95.45%, C: 4.55%	G: 86.87%, C: 13.13%	0.1745	0.7442	34.5433	0
Toscani in Italia	TSI	107	CCT: 95.33%, C: 4.67%	G: 85.98%, C: 14.02%	0.086	0.5348	18.4007	0
Finnish in Finland	FIN	99	CCT: 98.48%, C: 1.52%	G: 89.9%, C: 10.1%	0.0542	0.6292	10.7334	0.0011
British in England and Scotland	GBR	91	CCT: 95.05%, C: 4.95%	G: 88.46%, C: 11.54%	0	0.037	0.0017	0.9672
Iberian Population in Spain	IBS	107	CCT: 95.79%, C: 4.21%	G: 89.25%, C: 10.75%	0.0919	0.502	19.6643	0
South Asian	SAS	489	CCT: 95.4%, C: 4.6%	G: 76.58%, C: 23.42%	0.0003	0.1459	0.3068	0.5797
Gujarati Indian from Houston, Texas	GIH	103	CCT: 97.09%, C: 2.91%	G: 79.61%, C: 20.39%	0.0031	0.1626	0.638	0.4244
Punjabi from Lahore, Pakistan	PJL	96	CCT: 92.19%, C: 7.81%	G: 74.48%, C: 25.52%	0.0014	0.2163	0.2609	0.6095
Bengali from Bangladesh	BEB	86	CCT: 97.09%, C: 2.91%	G: 75.0%, C: 25.0%	0.01	1	1.7166	0.1901
Sri Lankan Tamil from the UK	STU	102	CCT: 96.08%, C: 3.92%	G: 73.04%, C: 26.96%	0.0001	0.0727	0.0163	0.8985
Indian Telugu from the UK	ITU	102	CCT: 94.61%, C: 5.39%	G: 80.39%, C: 19.61%	0.0001	0.0727	0.015	0.9025
Population	Abbrev	N	rs34880821 Allele Freq	rs2069840 Allele Freq	R2	D'	Chisq	P
All Populations	ALL	2504	G: 85.46%, A: 14.54%	C: 81.44%, G: 18.56%	0.6542	0.9359	3274.71	0
African	AFR	661	G: 90.0%, A: 10.0%	C: 85.0%, G: 15.0%	0.4823	0.8752	636.644	0
Yoruba in Ibadan, Nigeria	YRI	108	G: 88.32%, A: 11.68%	C: 80.84%, G: 19.16%	0.4047	0.8516	86.6135	0
Luhya in Webuye, Kenya	LWK	99	G: 89.39%, A: 10.61%	C: 88.38%, G: 11.62%	0.4819	0.7306	95.4103	0
Gambian in Western Divisions in the Gambia	GWD	113	G: 88.5%, A: 11.5%	C: 79.65%, G: 20.35%	0.4608	0.9517	104.13	0
Mende in Sierra Leone	MSL	85	G: 90.0%, A: 10.0%	C: 87.06%, G: 12.94%	0.7475	1	127.071	0
Esan in Nigeria	ESN	99	G: 93.94%, A: 6.06%	C: 90.4%, G: 9.6%	0.6078	1	120.346	0
Americans of African Ancestry in SW USA	ASW	61	G: 90.16%, A: 9.84%	C: 85.25%, G: 14.75%	0.5131	0.9022	62.5975	0
African Caribbeans in Barbados	ACB	96	G: 90.1%, A: 9.9%	C: 84.9%, G: 15.1%	0.3491	0.752	67.0278	0
Ad Mixed American	AMR	347	G: 79.25%, A: 20.75%	C: 73.78%, G: 26.22%	0.6557	0.9435	455.053	0
Mexican Ancestry from Los Angeles USA	MXL	64	G: 78.12%, A: 21.88%	C: 72.66%, G: 27.34%	0.5408	0.8525	69.2161	0
Puerto Ricans from Puerto Rico	PUR	104	G: 81.25%, A: 18.75%	C: 73.56%, G: 26.44%	0.5556	0.9303	115.558	0
Colombians from Medellin, Colombia	CLM	94	G: 78.72%, A: 21.28%	C: 73.4%, G: 26.6%	0.7459	1	140.238	0
Peruvians from Lima, Peru	PEL	85	G: 78.24%, A: 21.76%	C: 75.29%, G: 24.71%	0.7881	0.9641	133.97	0
East Asian	EAS	504	G: 93.95%, A: 6.05%	C: 93.75%, G: 6.25%	0.9662	1	973.939	0
Han Chinese in Beijing, China	CHB	103	G: 88.35%, A: 11.65%	C: 88.35%, G: 11.65%	1	1	206	0
Japanese in Tokyo, Japan	JPT	104	G: 94.23%, A: 5.77%	C: 93.75%, G: 6.25%	0.9184	1	191.02	0
Southern Han Chinese	CHS	105	G: 94.29%, A: 5.71%	C: 93.81%, G: 6.19%	0.9184	1	192.867	0
Chinese Dai in Xishuangbanna, China	CDX	93	G: 98.39%, A: 1.61%	C: 98.39%, G: 1.61%	1	1	186	0
Kinh in Ho Chi Minh City, Vietnam	KHV	99	G: 94.95%, A: 5.05%	C: 94.95%, G: 5.05%	1	1	198	0
European	EUR	503	G: 74.75%, A: 25.25%	C: 66.8%, G: 33.2%	0.5794	0.9234	582.906	0
Utah Residents (CEPH) with Northern and Western European Ancestry	CEU	99	G: 79.29%, A: 20.71%	C: 70.2%, G: 29.8%	0.5327	0.9305	105.477	0
Toscani in Italia	TSI	107	G: 75.7%, A: 24.3%	C: 66.82%, G: 33.18%	0.5397	0.9137	115.492	0
Finnish in Finland	FIN	99	G: 77.78%, A: 22.22%	C: 76.26%, G: 23.74%	0.7121	0.8808	141.002	0
British in England and Scotland	GBR	91	G: 69.78%, A: 30.22%	C: 61.54%, G: 38.46%	0.6134	0.9409	111.647	0
Iberian Population in Spain	IBS	107	G: 71.03%, A: 28.97%	C: 59.35%, G: 40.65%	0.5325	0.9456	113.947	0
South Asian	SAS	489	G: 85.99%, A: 14.01%	C: 84.46%, G: 15.54%	0.8104	0.9568	792.558	0
Gujarati Indian from Houston, Texas	GIH	103	G: 83.98%, A: 16.02%	C: 81.55%, G: 18.45%	0.7818	0.9628	161.054	0
Punjabi from Lahore, Pakistan	PJL	96	G: 83.85%, A: 16.15%	C: 80.73%, G: 19.27%	0.7434	0.96	142.74	0
Bengali from Bangladesh	BEB	86	G: 87.21%, A: 12.79%	C: 86.63%, G: 13.37%	0.8531	0.9475	146.725	0
Sri Lankan Tamil from the UK	STU	102	G: 84.31%, A: 15.69%	C: 83.82%, G: 16.18%	0.8257	0.9254	168.434	0
Indian Telugu from the UK	ITU	102	G: 90.69%, A: 9.31%	C: 89.71%, G: 10.29%	0.895	1	182.576	0
	Query SNPs:
	rs34880821 (chr7:22775450)
	rs2069840 (chr7:22768572)
	EUR Haplotypes:
	rs2069840
	C G
	-----------------
	A | 14 | 243 | 257 (0.255)
	rs34880821 -----------------
	G | 658 | 91 | 749 (0.745)
	-----------------
	672 334 1006
	(0.668) (0.332)
	G_C: 658 (0.654)
	A_G: 243 (0.242)
	G_G: 91 (0.09)
	A_C: 14 (0.014)
	D': 0.9185
	R2: 0.5824
	Chi-sq: 585.8456
	p-value: <0.0001
	rs34880821(A) allele is correlated with rs2069840(G) allele
	rs34880821(G) allele is correlated with rs2069840(C) allele
